# Supplementary material for: Hypnotizability and time reproduction
Source: Research Square preprint supplement (doi:10.21203/rs.3.rs-8582338/v1), 2026-01-20
Supplement: Supplementary file 1 [file fa5af16f96eadac8b35fd0eb.docx]

**Supplementary Electronic Material**

**Table S1.** *Descriptive statistics of all measured variables and sex differences*

|  |  | **All** | |  | **Females** | |  | **Males** | |  | **sex difference *t*-test** | |
| --- | --- | --- | --- | --- | --- | --- | --- | --- | --- | --- | --- | --- |
|  |  | ***M*** | ***SD*** |  | ***M*** | ***SD*** |  | ***M*** | ***SD*** |  | ***t*** | ***p*** |
| **SHSS: A** |  | 5.38 | 3.79 |  | 5.92 | 3.98 |  | 4.56 | 3.46 |  | 1.14 | .262 |
| **MODTAS** |  | 57.05 | 21.57 |  | 55.88 | 23.52 |  | 58.81 | 18.86 |  | 0.44 | .665 |
| **STAI-Y2** |  | 49.02 | 10.54 |  | 49.42 | 11.02 |  | 48.44 | 10.09 |  | 0.29 | .774 |
| **HR** |  | 78.81 | 12.29 |  | 80.97 | 11.65 |  | 75.56 | 12.89 |  | 1.35 | .187 |
| **RE** | **1s** | .17 | .34 |  | .13 | .29 |  | .23 | .41 |  | 0.81 | .426 |
|  | **3s** | .03 | .19 |  | .02 | .21 |  | .05 | .17 |  | 0.45 | .654 |
|  | **6s** | -.05 | .14 |  | -.05 | .15 |  | -.05 | .14 |  | 1.35 | .894 |
|  | **8s** | -.09 | .10 |  | -.10 | .11 |  | -.09 | .09 |  | 0.33 | .743 |
| **AE** | **1s** | .39 | .22 |  | .36 | .17 |  | .43 | .28 |  | 0.84 | .411 |
|  | **3s** | .22 | .11 |  | .23 | .11 |  | .20 | .10 |  | 0.96 | .345 |
|  | **6s** | .17 | .08 |  | .17 | .08 |  | .17 | .09 |  | 0.06 | .950 |
|  | **8s** | .16 | .08 |  | .17 | .08 |  | .14 | .07 |  | 1.39 | .174 |

**Table S2.** *Post-hoc comparisons of AE between different time intervals at low (- 1 SD), medium (M) and high (+1 SD) hypnotizability levels*

| **SHSS: A** |  | **-1 SD** | |  | **M** | |  | **+1 SD** | |
| --- | --- | --- | --- | --- | --- | --- | --- | --- | --- |
|  |  | ***z*** | ***p*** |  | ***z*** | ***p*** |  | ***z*** | ***p*** |
| 1s - 3s |  | 4.76 | < .001 |  | 8.50 | < .001 |  | 7.11 | < .001 |
| 1s - 6s |  | 7.51 | < .001 |  | 12.95 | < .001 |  | 10.58 | < .001 |
| 1s - 8s |  | 7.26 | < .001 |  | 13.71 | < .001 |  | 11.87 | < .001 |
| 3s - 6s |  | 2.80 | .027 |  | 4.50 | < .001 |  | 3.52 | .002 |
| 3s - 8s |  | 2.53 | .055 |  | 5.25 | < .001 |  | 4.84 | < .001 |
| 6s - 8s |  | -0.27 | .993 |  | 0.76 | .871 |  | 1.34 | .537 |
